# Supplementary material for: Characterising absorption and health-related properties of phytochemicals extracted from Malaysian palm fruit biomass after oil extraction
Source: Royal Society of Chemistry journal article supplement (doi:10.1039/c9fo01149h), 2019-12-31

**Figure S1. Comparison of molecular features detected by LC-MS in whole extract, permeate (fraction that passed the 3k Da MWCO membrane) and retentate (fraction that did not pass the 3k Da MWCO membrane) of all samples. Boxplots represent the summary of the sample distribution, including interquartile range box (middle 50% of the data), maximum data points within 1.5 box heights from the top (upper whisker) and bottom (lower whisker) of the box, and outliers (\*).**

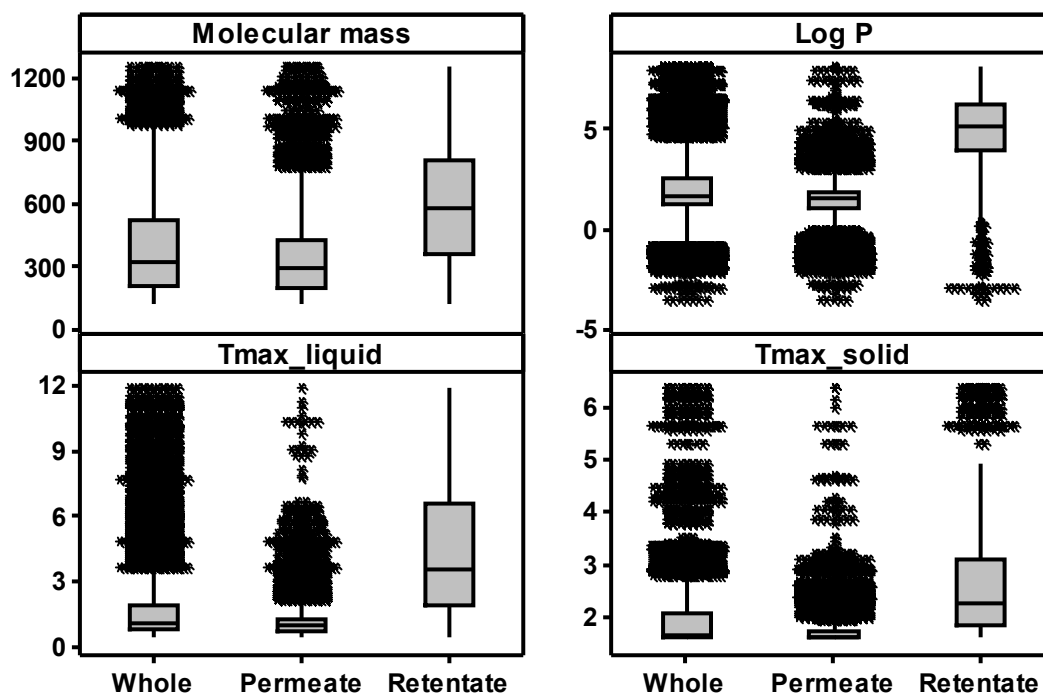

**Figure S2. Comparison of molecular features detected by LC-MS in whole extract, permeate (fraction that passed the 3k Da MWCO membrane) and retentate (fraction that did not pass the 3k Da MWCO membrane) of (A) EM-M, and (B) WM-M. Boxplots represent the summary of the sample distribution, including interquartile range box (middle 50% of the data), maximum data points within 1.5 box heights from the top (upper whisker) and bottom (lower whisker) of the box, and outliers (\*).**

A

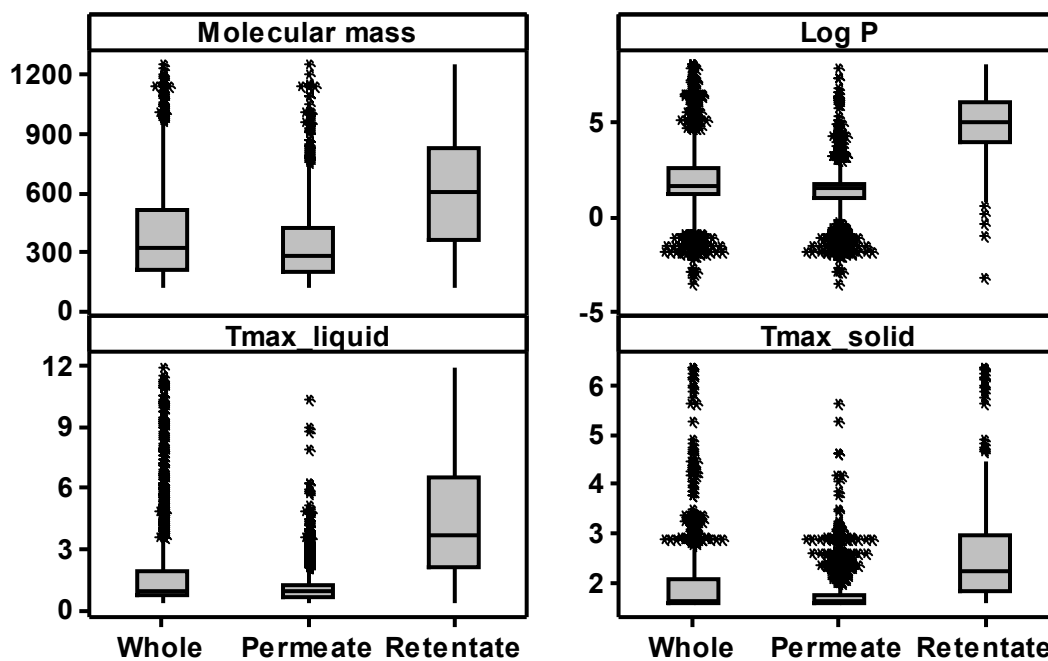

B

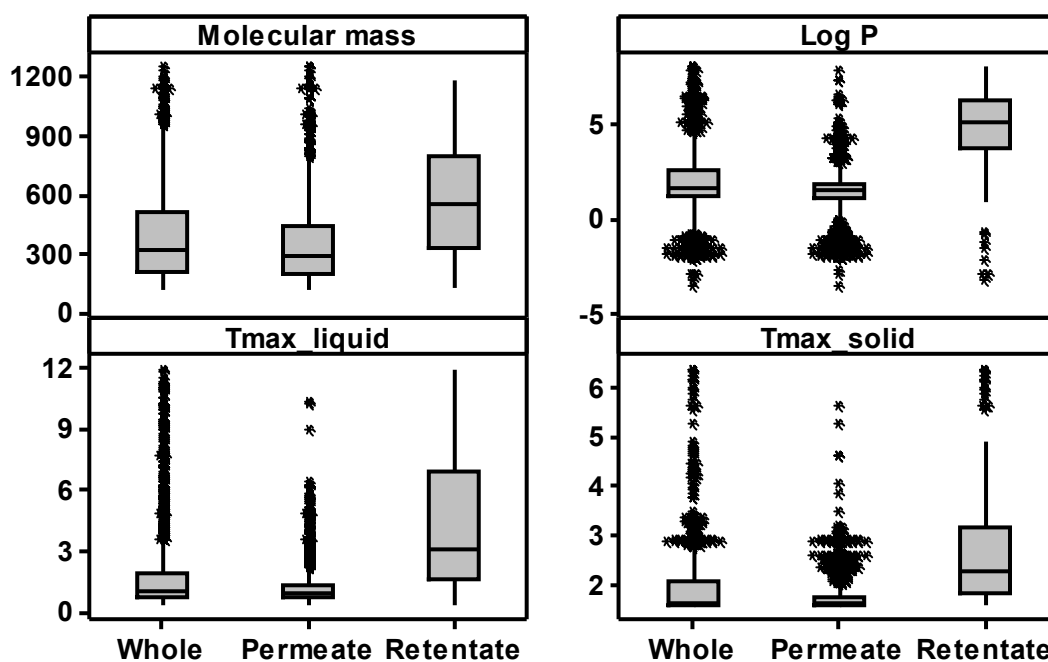

**Figure S3. Comparison of molecular features detected by LC-MS in whole extract, permeate (fraction that passed the 3k Da MWCO membrane) and retentate (fraction that did not pass the 3k Da MWCO membrane) of (A) JM-M, and (B) SM-M. Boxplots represent the summary of the sample distribution, including interquartile range box (middle 50% of the data), maximum data points within 1.5 box heights from the top (upper whisker) and bottom (lower whisker) of the box, and outliers (\*).**

A

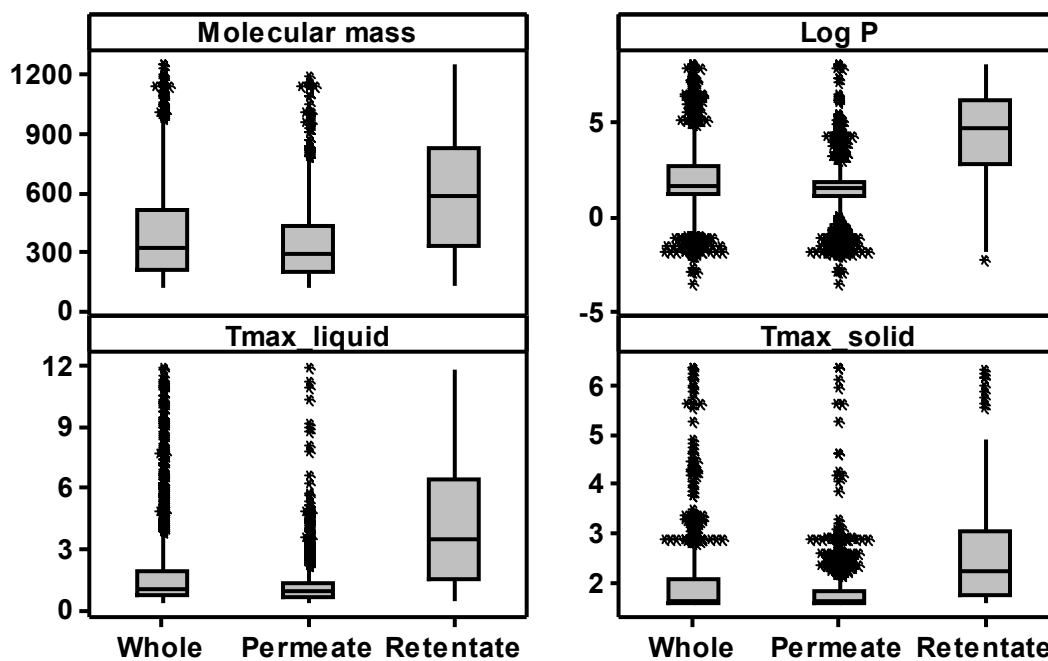

B

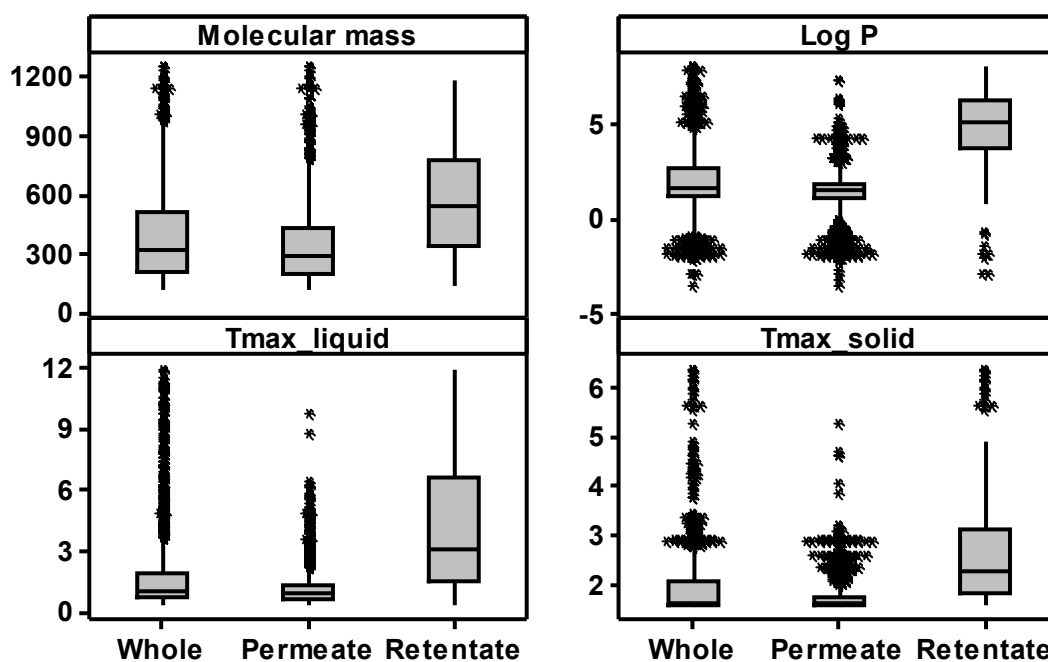

**Figure S4. Comparison of molecular features detected by LC-MS in whole extract, permeate (fraction that passed the 3k Da MWCO membrane) and retentate (fraction that did not pass the 3k Da MWCO membrane) of (A) EM-K, and (B) WM-K. Boxplots represent the summary of the sample distribution, including interquartile range box (middle 50% of the data), maximum data points within 1.5 box heights from the top (upper whisker) and bottom (lower whisker) of the box, and outliers (\*).**

A

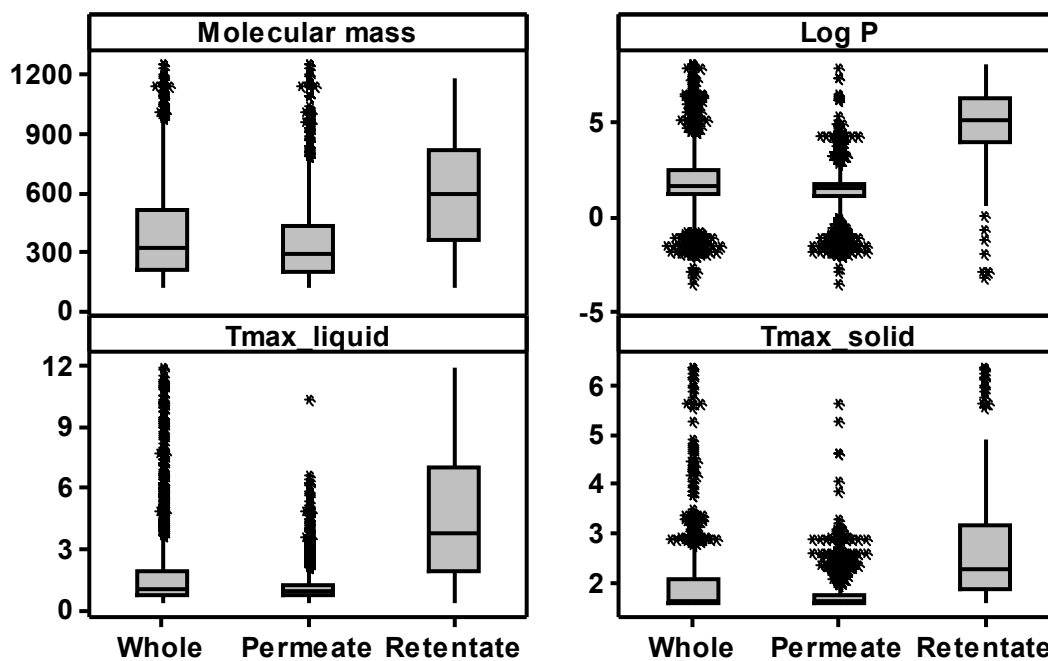

B

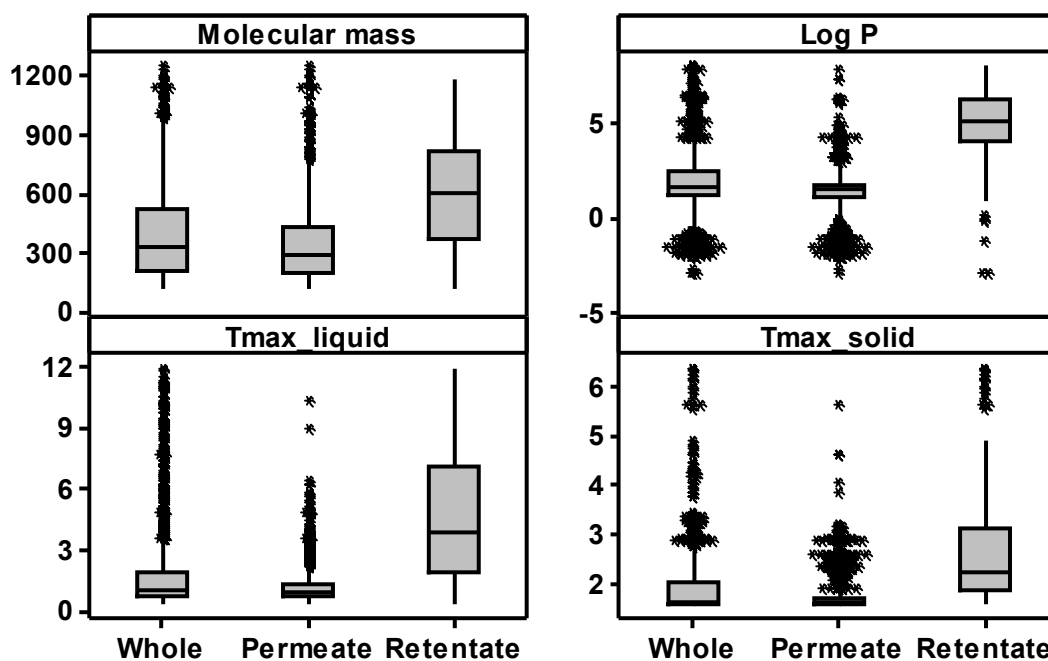

**Figure S5. Comparison of molecular features detected by LC-MS in whole extract, permeate (fraction that passed the 3k Da MWCO membrane) and retentate (fraction that did not pass the 3k Da MWCO membrane) of (A) JM-K, and (B) SM-K. Boxplots represent the summary of the sample distribution, including interquartile range box (middle 50% of the data), maximum data points within 1.5 box heights from the top (upper whisker) and bottom (lower whisker) of the box, and outliers (\*).**

A

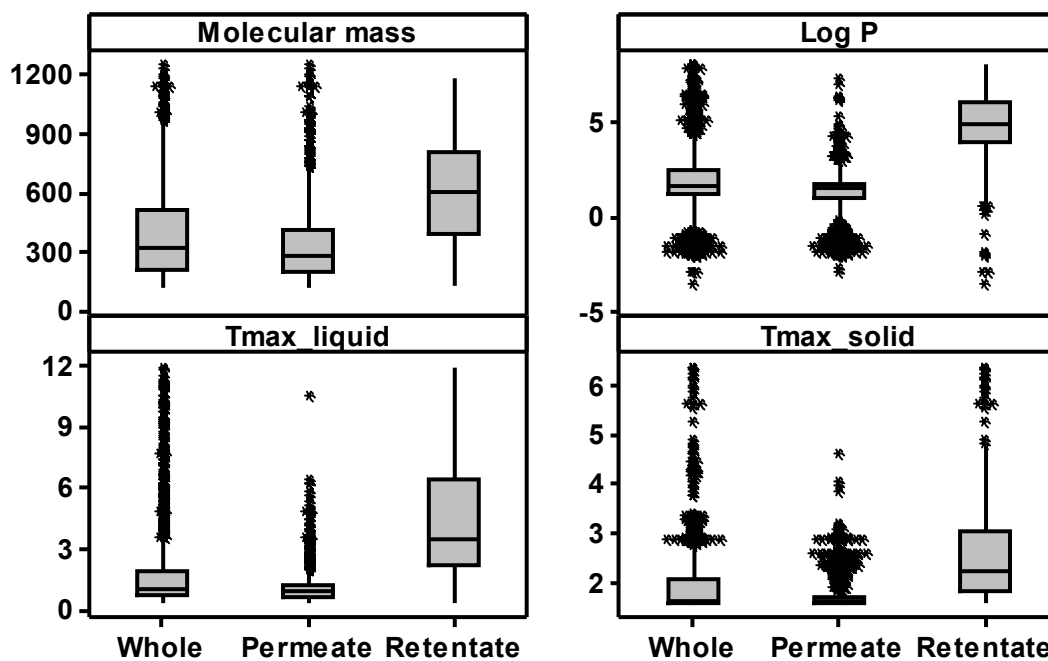

B

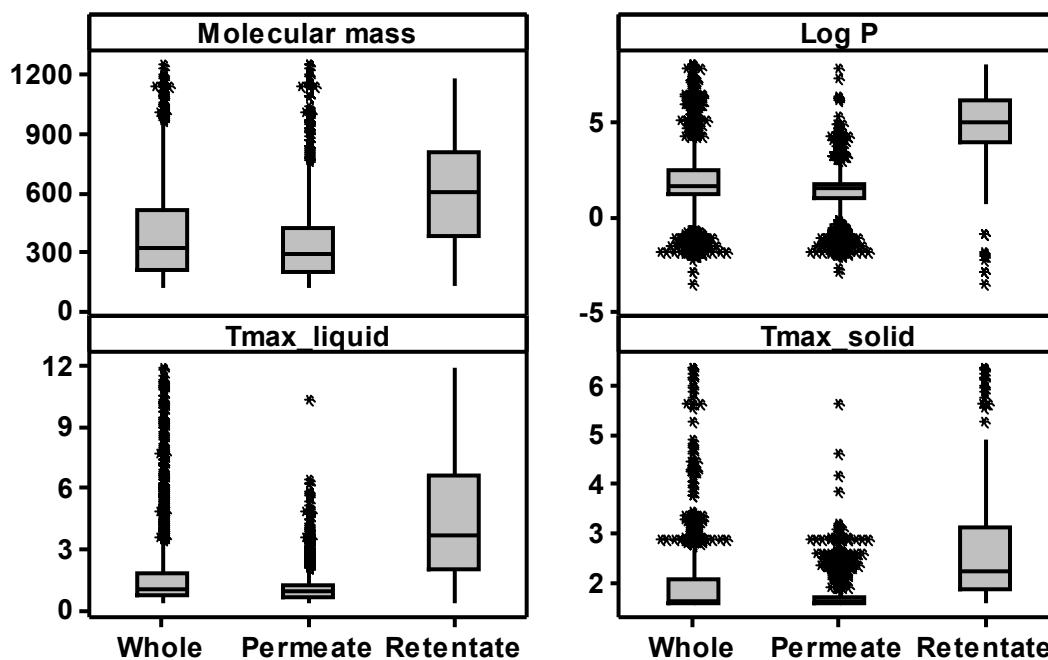

Supplement: c9fo01149h1.pdf [file c9fo01149h1.pdf]
